# Supplementary material for: Global nutrient cycling by commercially targeted marine fish
Source: Copernicus journal article supplement (doi:10.5194/bg-19-2537-2022), 2022-05-18
Supplement: Supplementary file 1 [file Supplement.pdf › Supplement.pdf]

## 1. Model-data comparison

The Bayesian Monte Carlo approach was not performed for the updated model with Fe limitation that we use in this study. Instead, we took the 31 combinations of selected parameters from the Monte Carlo approach on the standard version of the model performed in Bianchi et al. (2021), and run 31 simulations with the updated Fe-limited version of the model. The Fe limitation decreases global fish biomass slightly (Galbraith et al., 2019) so that we underestimate the global LME peak catch of  $110\text{Mt} \cdot \text{yr}^{-1}$  (Fig. S1). The comparison of modeled versus observed peak catch across LMEs gives an  $r^2$  of 0.42 (p-value  $< 10^{-9}$ ) for the ensemble average, while the ensemble member with the best fit to observations has an  $r^2$  of 0.57 (p-value  $< 10^{-9}$ ) (Fig. S2) (Bianchi et al., 2021).

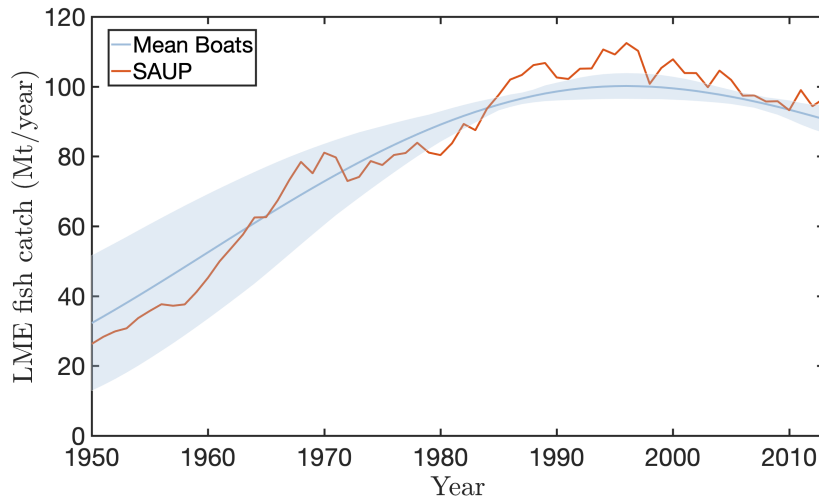

**Figure S1:** Modeled fish catch from the 31 simulations of the ensemble from 1950 to 2010s compared to SAUP reconstructed catch data.

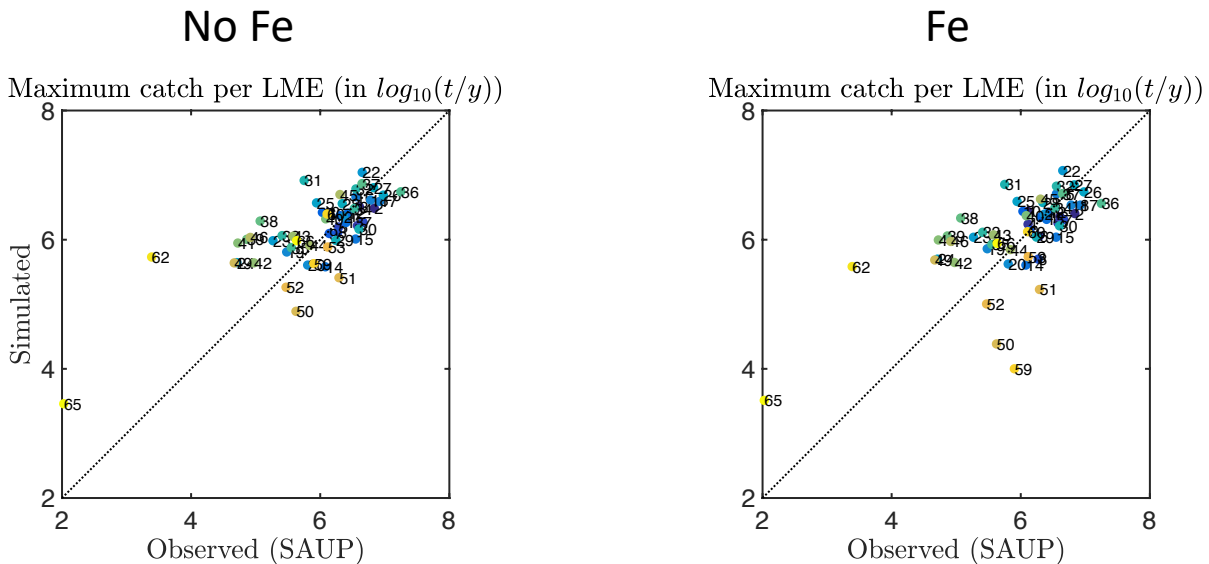

**Figure S2:** Comparison between LMEs maximum catch from data and from the model ensemble in the ensemble of simulations with no Fe limitation and in the ensemble of simulations with Fe limitation. Each number represents one LME.

## 2. Global values and nutrient inputs to the ocean

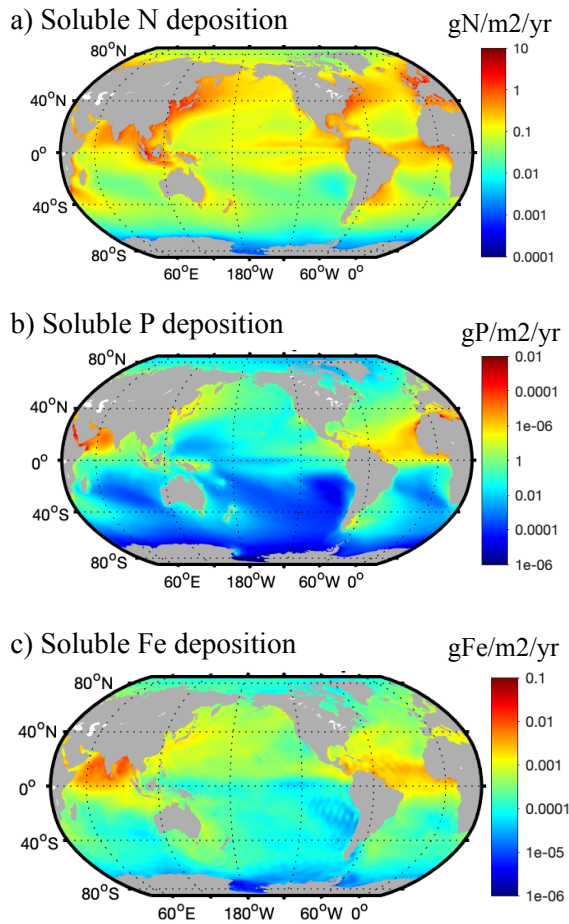

**Figure S3:** Modeled deposition fields of soluble a) N (gN/m<sup>2</sup>/yr), b) P (gP/m<sup>2</sup>/yr) and c) Fe (gFe/m<sup>2</sup>/yr) used to make Figure 8. N and P fields are from Brahney et al. (2015), Fe field is from Mahowald et al. (2009).

**Table S1:** Inputs of nutrients to the ocean.

| Sources (Tg/yr)         | N        | P             | Fe        | Reference                      | Comment                                      |
|-------------------------|----------|---------------|-----------|--------------------------------|----------------------------------------------|
| Atmospheric deposition  | 63       | 0.32          | 0.36      | Okin et al. (2011)             |                                              |
|                         | -        | 0.17          | -         | Myriokefalitakis et al. (2016) | bioavailable P                               |
|                         | 29.4     | -             | -         | Fowler et al. (2013)           |                                              |
|                         | -        | -             | 13.4      | Ito (2015)                     |                                              |
|                         | -        | -             | 8.4       | Wang et al. (2015)             | With Anthropogenic input                     |
|                         | 50       | -             | -         | Gruber and Galloway (2008)     | $NO_3^-$ and $NH_4^+$                        |
|                         | -        | 0.31          | -         | Benitez-Nelson (2000)          | pre-anthropogenic, soluble reactive P        |
|                         | 16 (6.4) | 0.35 (0.02)   | -         | Kanakidou et al. (2012)        | organic soluble (anthropogenic contribution) |
|                         | 36.6     | -             | -         | Kanakidou et al. (2012)        | Total inorganic N                            |
|                         | -        | 0.24 ( 0.034) | -         | Mahowald et al. (2009)         | Inorganic P (anthropogenic contribution)     |
|                         | -        | -             | 0.6-2     | Moreno and Haffa (2014)        |                                              |
| Rivers                  | -        | 0.93-4.7      | -         | Benitez-Nelson (2000)          | pre-anthropogenic                            |
|                         | -        | 23-48         | -         | Benitez-Nelson (2000)          | Total with anthropogenic                     |
|                         | 80       | -             | -         | Gruber and Galloway (2008)     |                                              |
|                         | -        | -             | 0.08-0.09 | Moreno and Haffa (2014)        |                                              |
| N <sub>2</sub> fixation | 140      | -             | -         | Gruber and Galloway (2008)     |                                              |
| Iceberg melting         | -        | -             | 0.09-0.1  | Moreno and Haffa (2014)        |                                              |

### 3. Body nutrient content versus body size

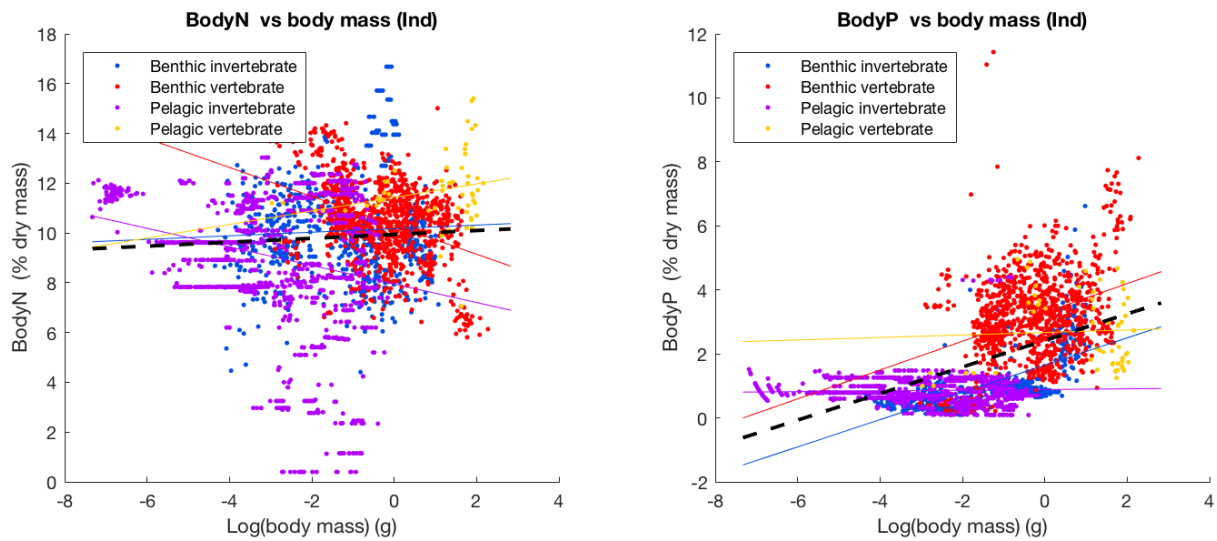

|                     | Nitrogen  |       |       |           | Phosphorus |       |      |            |
|---------------------|-----------|-------|-------|-----------|------------|-------|------|------------|
|                     | Intercept | Slope | R     | p-value   | Intercept  | Slope | R    | p-value    |
| <b>All</b>          | 9.9       | 0.08  | 0.07  | 4.3e-5**  | 2.4        | 0.42  | 0.58 | 3.4e-299** |
| <b>Invertebrate</b> |           |       |       |           |            |       |      |            |
| All                 | 9.3       | -0.07 | -0.05 | 0.0138*   | 1.3        | 0.12  | 0.34 | 4.2e-63**  |
| Pelagic             | 8.0       | -0.37 | -0.25 | 6.1e-24** | 0.9        | 0.01  | 0.04 | 0.113      |
| Benthic             | 10.2      | 0.07  | 0.05  | 0.207     | 1.7        | 0.43  | 0.66 | 3.3e-87**  |
| <b>Vertebrate</b>   |           |       |       |           |            |       |      |            |
| All                 | 10.4      | -0.41 | -0.29 | 2e-21**   | 3.2        | 0.37  | 0.29 | 8.4e-22**  |
| Pelagic             | 11.4      | 0.27  | 0.26  | 0.058     | 2.7        | 0.04  | 0.05 | 0.74       |
| Benthic             | 10.3      | -0.58 | -0.39 | 3.6e-37** | 3.3        | 0.45  | 0.34 | 4.0e-28**  |

**Figure S4:** Body N (% of dry weight) and body P (% of dry weight), as a function of body mass (log(g)) for pelagic (purple) and benthic (blue) invertebrates and for pelagic (orange) and benthic (red) vertebrates. Regression lines for each type of organisms are shown in the same color. The dashed black line is the global regression line. Regression coefficients are given in the underneath table. Data from Vanni et al. (2017).

#### 4. Cycling of N and P, Fe cycling computations versus PP demand for Fe

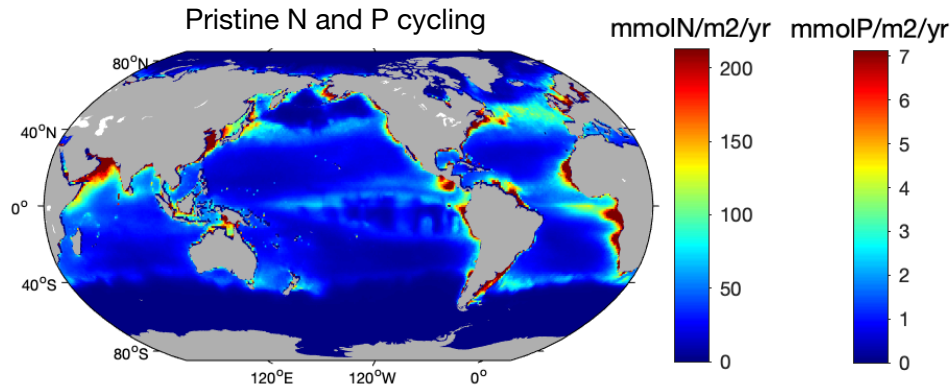

**Figure S5:** N and P cycling prior to industrial fishing.

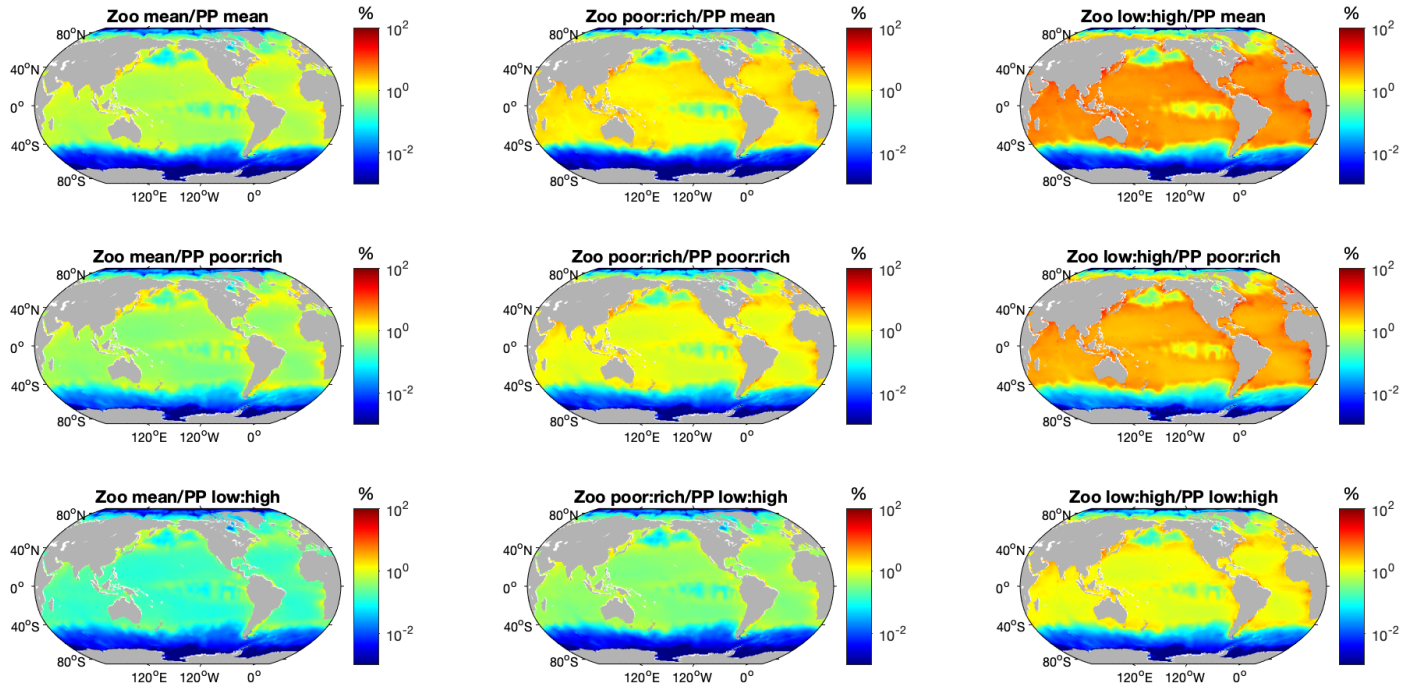

**Figure S6:** Fish Fe cycling relative to phytoplankton demand for Fe.

The columns distinguish between three computations of the Fe cycling by fish: *left* = using a mean Fe:C in zooplankton, *middle* = using a spatial interpolation between the zooplankton mean Fe:C in Fe-rich and in Fe-poor conditions, *right* = using a spatial interpolation between the zooplankton low Fe:C and high Fe:C estimates. The rows distinguish between three computations of the phytoplankton Fe demand: *top* = using a mean Fe:C in phytoplankton, *middle* = using a spatial interpolation between the mean phytoplankton Fe:C values in Fe-rich and Fe-poor conditions, *bottom* = using a spatial interpolation between low and high phytoplankton Fe:C estimates (Table 1). Spatial interpolations are based on nitrate concentrations as a proxy for Fe concentrations (HNLC vs. non-HNLC areas).

## 5. Size-spectrum of abundance, biomass and C cycling

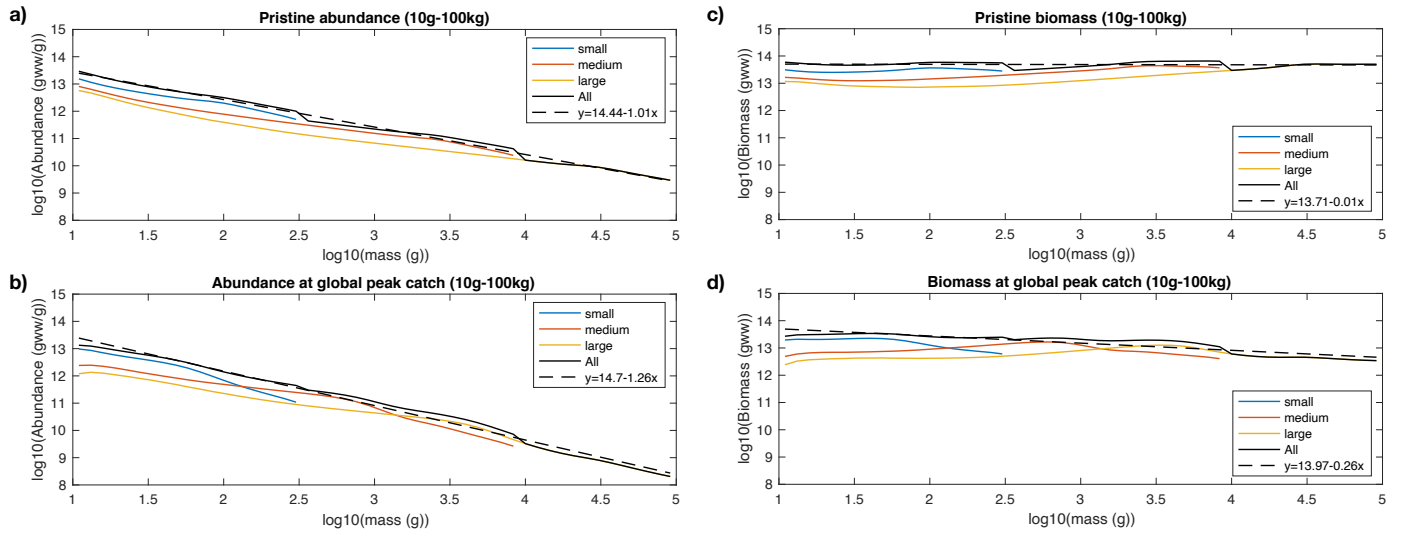

**Figure S7:** Size-spectrum of modeled  $CTF^{100kg}_{10g}$  abundance a) in the pristine state and b) at global peak catch, and size-spectrum of modeled  $CTF^{100kg}_{10g}$  biomass c) in the pristine state and d) at global peak catch.

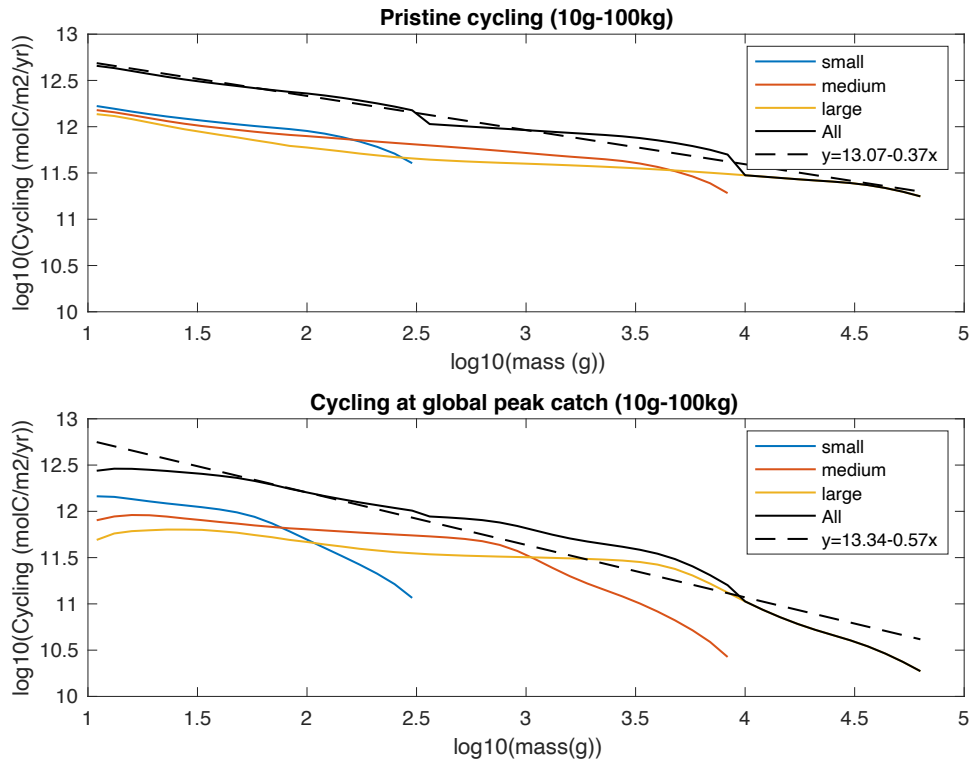

**Figure S8:** Size spectrum of modeled  $CTF^{100kg}_{10g}$  C cycling a) in the pristine state and b) at global peak catch.

## References

- Benitez-Nelson, C. R.: The biogeochemical cycling of phosphorus in marine systems, *Earth Science Reviews*, 51, 109–135, [https://doi.org/10.1016/S0012-8252\(00\)00018-0](https://doi.org/10.1016/S0012-8252(00)00018-0), 2000.
- Bianchi, D., Carozza, D. A., Galbraith, E. D., Guet, J., and DeVries, T.: Estimating global biomass and biogeochemical cycling of marine fish with and without fishing, *Science Advances*, 7, <https://doi.org/10.1126/sciadv.abd7554>, 2021.
- Brahney, J., Mahowald, N., Ward, D. S., Ballantyne, A. P., and Neff, J. C.: Is atmospheric phosphorus pollution altering global alpine Lake stoichiometry?, *Global Biogeochemical Cycles*, 29, 1369–1383, <https://doi.org/10.1002/2015GB005137>, <https://onlinelibrary.wiley.com/doi/abs/10.1002/2015GB005137>, 2015.
- Fowler, D., Coyle, M., Skiba, U., Sutton, M., Cape, J. N., Reis, S., Sheppard, L., Jenkins, A., Grizetti, B., Galloway, J. N., Vitousek, P., Leach, A., Bouwman, L., Butterbach-Bahl, K., Dentener, F., Stevenson, D., Amann, M., and Voss, M.: The global nitrogen cycle in the 21st century, *Philosophical Transactions of the Royal Society of London, B Biological Sciences*, 368, 20130 165, 2013.
- Galbraith, E. D., Le Mézo, P. K., Solanes Hernandez, G., Bianchi, D., and Kroodsma, D.: Growth limitation of marine fish by low iron availability in the open ocean, *Frontiers in Marine Science*, 6, 1–13, <https://doi.org/10.3389/fmars.2019.00509>, <https://www.frontiersin.org/article/10.3389/fmars.2019.00509/full>, 2019.
- Gruber, N. and Galloway, J. N.: An Earth-system perspective of the global nitrogen cycle, *Nature*, 451, 293–296, <https://doi.org/10.1038/nature06592>, 2008.
- Ito, A.: Atmospheric Processing of Combustion Aerosols as a Source of Bioavailable Iron, *Environmental Science & Technology Letters*, 2, 70–75, <https://doi.org/10.1021/acs.estlett.5b00007>, <https://pubs.acs.org/doi/10.1021/acs.estlett.5b00007>, 2015.
- Kanakidou, M., Duce, R. A., Prospero, J. M., Baker, A. R., Benitez-Nelson, C., Dentener, F. J., Hunter, K. A., Liss, P. S., Mahowald, N.,
- Mahowald, N. M., Engelstaedter, S., Luo, C., Sealy, A., Artaxo, P., Benitez-Nelson, C., Bonnet, S., Chen, Y., Chuang, P. Y., Cohen, D. D., Dulac, F., Herut, B., Johansen, A. M., Kubilay, N., Losno, R., Maenhaut, W., Paytan, A., Prospero, J. M., Shank, L. M., and Siefert, R. L.: Atmospheric Iron Deposition: Global Distribution, Variability, and Human Perturbations, *Annual Review of Marine Science*, 1, 245–278, <https://doi.org/10.1146/annurev.marine.010908.163727>, 2009.
- Moreno, A. R. and Haffa, A. L. M.: The Impact of Fish and the Commercial Marine Harvest on the Ocean Iron Cycle, *PLoS ONE*, 9, e107 690, <https://doi.org/10.1371/journal.pone.0107690>, <https://dx.plos.org/10.1371/journal.pone.0107690>, 2014.
- Myriokefalitakis, S., Nenes, A., Baker, A. R., Mihalopoulos, N., and Kanakidou, M.: Bioavailable atmospheric phosphorous supply to the global ocean: A 3-D global modeling study, *Biogeosciences*, 13, 6519–6543, <https://doi.org/10.5194/bg-13-6519-2016>, 2016.
- Okin, G. S., Baker, A. R., Tegen, I., Mahowald, N. M., Dentener, F. J., Duce, R. A., Galloway, J. N., Hunter, K., Kanakidou, M., Kubilay, N., Prospero, J. M., Sarin, M., Surapipith, V., Uematsu, M., and Zhu, T.: Impacts of atmospheric nutrient deposition on marine productivity: Roles of nitrogen, phosphorus, and iron, *Global Biogeochemical Cycles*, 25, 1–10, <https://doi.org/10.1029/2010GB003858>, 2011.
- Vanni, M. J., McIntyre, P. B., Allen, D., Arnott, D. L., Benstead, J. P., Berg, D. J., Brabrand, Å., Brosse, S., Bukaveckas, P. A., Caliman, A., Capps, K. A., Carneiro, L. S., Chadwick, N. E., Christian, A. D., Clarke, A., Conroy, J. D., Cross, W. F., Culver, D. A., Dalton, C. M., Devine, J. A., Domine, L. M., Evans-White, M. A., Faafeng, B. A., Flecker, A. S., Gido, K. B., Godinot, C., Guariento, R. D., Haertel- Borer, S., Hall, R. O., Henry, R., Herwig, B. R., Hicks, B. J., Higgins, K. A., Hood, J. M., Hopton, M. E., Ikeda, T., James, W. F., Jansen, H. M., Johnson, C. R., Koch, B. J., Lamberti, G. A., Lessard-Pilon, S., Maerz, J. C., Mather, M. E., McManamay, R. A., Milanovich, J. R., Morgan, D. K., Moslemi, J. M., Naddafi, R., Nilssen, J. P., Pagano, M., Pilati, A., Post, D. M., Roopin, M., Rugenski, A. T., Schaus, M. H., Shostell, J., Small, G. E., Solomon, C. T., Sterrett, S. C., Strand, Ø., Tarvainen, M., Taylor, J. M., Torres-Gerald, L. E., Turner, C. B., Urabe, J., Uye, S. I., Ventelä, A. M., Villeger, S., Whiles, M. R., Wilhelm, F. M., Wilson, H. F., Xenopoulos, M. A., and Zimmer, K. D.: A global database of nitrogen and phosphorus excretion rates of aquatic animals, <https://doi.org/10.1002/ecy.1792>, 2017.

Wang, R., Balkanski, Y., Boucher, O., Bopp, L., Chappell, A., Ciais, P., Hauglustaine, D., Peñuelas, J., and Tao, S.: Sources, transport and deposition of iron in the global atmosphere, *Atmospheric Chemistry and Physics*, 15, 6247–6270, [https://doi.org/10.5194/acp-15-6247-](https://doi.org/10.5194/acp-15-6247-2015) 2015, 2015.
