# Supplementary material for: Global nutrient cycling by commercially targeted marine fish
Source: Copernicus journal article supplement (doi:10.5194/bg-19-2537-2022), 2022-05-18
Supplement: Supplementary file 1 [file Tables S2 and S3.xlsx]

## Sheet: Table S2_ Fish N and P content
reference	N content	P content	C content	original units	%N ww	%P ww	C%ww	C/N	C/P	N/P	comment
Czamanski et al 2011	11	2.3	45.5	% dry weight	2.75	0.575	11.375	4.8	58.2	12.1	Wild marine fish, Assuming 25% dw in ww		0.000336691	0.00181132	0.00181946	0.00181132	0.0404221	0.0326417
	12.3	2	46		3.075	0.5	11.5	4.4	66.2	15.2			0.0169138	0.0332412	0.00287127	0.00197596	0.1088	0.167085
	12.7	2.5	45.5		3.175	0.625	11.375	4.1	48.1	11.5			0.0262621	0.00166644	0.00181946	0.013241	0.00010919	0.0168511
	12.1	2	46.3		3.025	0.5	11.575	4.5	67	15.1			0.0129184	0.0332412	0.00361018	0.000483072	0.116868	0.161732
	9.8	2	47.5		2.45	0.5	11.875	6.8	76.5	13			0.00944079	0.0332412	0.00733979	0.152776	0.22511	0.0637128
	12.2	2.2	42.3		3.05	0.55	10.575	4	54.9	13.5			0.0148571	0.00757098	0.000916277	0.0195334	0.0203577	0.0841895
	11.6	2.3	42.4		2.9	0.575	10.6	4.3	51.4	12			0.00510638	0.00181132	0.0007789	0.00454833	0.00589907	0.0297118
	13.4	2.9	42.9		3.35	0.725	10.725	3.8	37	10.5			0.0465302	0.0358125	0.000261965	0.0365021	0.0634611	0.00150853
	10.5	2.9	42		2.625	0.725	10.5	4.7	42.6	8.8			0.000793598	0.0358125	0.00139783	0.000462517	0.0123162	0.0189843
	11.5	2.4	42.8		2.875	0.6	10.7	4.3	44.8	10.9			0.00394395	0	0.000342955	0.00454833	0.00367534	0.00581061
	7.1	3.5	43.8		1.775	0.875	10.95	7.3	37.5	5.1			0.175939	0.142351	2.09459e-05	0.213276	0.0568784	0.466892
	13	3.8	41.4		3.25	0.95	10.35	4.5	46.4	10.7			0.0343744	0.21117	0.00268078	0.000483072	0.00065195	0.00333025
	11.7	2	46.8		2.925	0.5	11.7	4.6	52.7	11.8			0.00640684	0.0332412	0.00501633	0	0.0103597	0.0242002
	11	3.6	38.8		2.75	0.9	9.7	4.1	29.1	7.1			0.000336691	0.164402	0.0136042	0.013241	0.242157	0.124214
	10.6	3.4	41.9		2.65	0.85	10.475	4.6	35	7.6			0.000349396	0.121318	0.00158176	0	0.0945468	0.0808761
Huang et al., 2012	10.21	2.11	45	% dw	2.5525	0.5275	11.25				Japanese anchovy,Huanghai Sea, China		0.00315602	0.0165845	0.000998897
	11.26	2.45			2.815	0.6125					Tanner et al., 2000		0.00173976	0.000425155
	9.7	1.49	46		2.425	0.3725	11.5				Sterner and George, 2000		0.0115391	0.227236	0.00287127
	10.4	3.27			2.6	0.8175					Dantas and Attayde, 2007		0.00142433	0.0956796
	10.24	2.53			2.56	0.6325					Dantas and Attayde, 2007		0.00283498	0.00278262
Hjerne and Hansson, 2002	2.4	0.43		% ww	2.4	0.43					Herring and sprat, Baltic Sea		0.0138728	0.110985
Beers, 1966								4.57	69.93	15.31	Fish and fish larvae, Bermuda, NATL					4.28121e-05	0.147965	0.173032
Schindler and Eby, 1997	2.54	0.5		% ww	2.54	0.5				5.1	From Davis and Boyd, 1975; Pencak et al., 1985; Nakashima and Leggett, 1980		0.00373171	0.0332412
Griffths, 2006		2.3		%dry weight (22% of ww)		0.506								0.0290338
Maranger et al., 2008	2.15			%ww	2.15						see paper		0.0518855
	2.57				2.57						see paper		0.00243502
	2.54				2.54						see paper		0.00373171
	2.84				2.84						see paper		0.00255553
	2.72				2.72						see paper		5.4466e-05
	2.54				2.54						see paper		0.00373171
	2.71				2.71						see paper		1.36668e-05
	2.42				2.42						see paper		0.0119868
	2.83				2.83						see paper		0.00221134
	2.46				2.46						see paper		0.00866583
	2.26				2.26						see paper		0.0316438
	2.3				2.3						see paper		0.0257098
	2.22				2.22						see paper		0.0383159
	2.85				2.85						see paper		0.00292326
	2.67				2.67						see paper		0.000124843
	2.87				2.87						see paper		0.00372835
	2.59				2.59						see paper		0.00173005
	3.2				3.2						see paper		0.0288657
	2.7				2.7						see paper		1.2326e-32
	2.36				2.36						see paper		0.0181145
	3.02				3.02						see paper		0.0125451
	2.88				2.88						see paper		0.00416522
	3.02				3.02						see paper		0.0125451
	2.66				2.66						see paper		0.000222775
	2.9				2.9						see paper		0.00510638
	2.85				2.85						see paper		0.00292326
	3.26				3.26						see paper		0.035523
	2.38				2.38						see paper		0.0159141
	3.49				3.49						see paper		0.0658692
	3.41				3.41						see paper		0.0545038
	3.18				3.18						see paper		0.0267746
	3.2				3.2						see paper		0.0288657
	3.79				3.79						see paper		0.114998
Ramseyer, 2002	2.71			%ww	2.71						60 fish species + 6 hybrids		1.36668e-05
Kraft, 1992	10	2		%dw	2.5	0.5					From other papers, dry:wet=0.25
MEAN all (arithmetic)					2.76906	0.623848	10.9838	4.71063	51.0831	10.9006
Standard deviation all					0.367604	0.160459	0.59015
MEAN Czamanski (arithmetic)					2.84167	0.663333	10.9317	4.72	49.8267	10.9933	only marine fish
Standard deviation Czamanski					0.391284	0.164008	0.619165	0.989372	13.1995	2.86069	only marine fish
Geometric mean (all)					2.74487	0.605236	10.9687	4.63636	49.3463	10.3645
Geometric std factor					1.14247	1.31805	1.0457	1.17941	1.29699	1.32882			1.01121	1.37266	0.0479322	0.462925	1.14958	1.45477
Geometric range: min					2.40257	0.459192	10.4893	3.93107	38.0469	7.79978
Geometric range: max					3.13593	0.797729	11.47	5.46818	64.0014	13.7725
geometric CI 0.95					1.2983	1.71816	1.09154	1.38187	1.66476	1.74579
95% min					2.11419	0.352258	10.0488	3.35514	29.6416	5.93684
95% max					3.56367	1.03989	11.9728	6.40682	82.1499	18.0942

## Sheet: Table S3_ Zooplankton N and P c
reference	organism	N content	P content	C content	original units	%N ww	%P ww	C/N	C/P	N/P	comment
Schindler and Eby, 1997	copepods	1.38	0.072		%ww	1.38	0.072			19.2	Andersen and Hessen, 1991			0.988394	-0.0116742	0.000136287
	bosmina	1.14	0.096			1.14	0.096			11.9	Andersen and Hessen, 1991			0.816499	-0.202729	0.0410992
	daphnia	1.14	0.17			1.14	0.17			6.7	Andersen and Hessen, 1991			0.816499	-0.202729	0.0410992
	mysis	1.72	0.18			1.72	0.18			9.6	Nakashima and Leggett, 1980 (a,b) ; Davis and boyd, 1975 ; Penczak et al., 1985			1.23191	0.208567	0.0435
	amphipods	1.72	0.18			1.72	0.18			9.6	Nakashima and Leggett, 1980 (a,b) ; Davis and boyd, 1975 ; Penczak et al., 1985			1.23191	0.208567	0.0435
Czamanski et al 2011	microzooplankton									21.5	Le Borgne (1982)					0.169335	0.411503	1.50908
	copepods							5.63	116	20.37	Beers (1996), Ikeda and Mitchell (1982), Uye and Matsuda (1988), Gismervik (1997), Walve and Larsson (1999)
	euphausids-mysids							4.58	120.2	26.15	Roger (1978), Beers (1966), Ikeda and Mitchell (1982)
	other crustacea							5.52	90.25	16.46	Beers (1966), Walve and Larsson (1999), Gismervik (1997), Pertola et al., (2001)
	chaetognaths							4.16	124.99	30.06	Beers (1966), Uye and Matsuda (1988)
	salps							4.39	148.99	34.14	Ikeda and Mitchell (1982), Igushi and Ikeda (2004), Le Borgne (1982)
	polychaetes							4.49	178.3	38.38	Beers (1966), Ikeda and Micthell (1982), Clarke (2008)
	mollusks							4.8	162.3	33.84	Ikeda and Mitchell (1982)
	siphonophores							4.28	200	46.72	Beers (1966)
	hydromedusae							2.91	108.7	37.4	Beers (1966)
	pteropods							8.15	196.08	24.06	Beers (1966)
Griffiths, 2006	Zooplankton		0.92		%dw (12%)		0.1104
	Zoobenthos		0.8		%dm (20%)		0.16
Kraft, 1992	Zooplankton	10	1		%dw						From other papers
						N (%ww)	P (%ww)	C/N	C/P	N/P
Arithmetic mean	zooplankton					1.42	0.138343	4.891	144.581	24.13
Standard deviations	zooplankton					0.290861	0.0445663	1.37079	38.338	11.8406
Geometric mean						1.3962	0.131293	4.7368	139.991	25.7959
Standard factor						1.20205	1.40043	1.28331	1.2912	1.80473
range: min						1.16152	0.0937517	3.69109	108.419	14.2935
range: max						1.67831	0.183867	6.07877	180.757	46.5545
geometric CI 0.95								1.63052	1.65025	3.18102
95% min								2.90508	84.8301	8.1093
95% max								7.72347	231.021	82.0573
