# Supplementary material for: Global nutrient cycling by commercially targeted marine fish
Source: Copernicus journal article supplement (doi:10.5194/bg-19-2537-2022), 2022-05-18
Supplement: Supplementary file [file bg-19-2537-2022-supplement-title-page.pdf › bg-19-2537-2022-supplement-title-page.pdf]

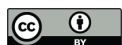

## *Supplement of*

# **Global nutrient cycling by commercially targeted marine fish**

**Priscilla Le Mézo et al.**

*Correspondence to:* Priscilla Le Mézo (priscilla.le-mezo@lmd.ens.fr)

- bg-19-2537-2022-supplement-title-page.pdf
- Supplement.pdf
- Tables S2 and S3.xlsx
- \_\_MACOSX
  - .\_Supplement.pdf
  - .\_Tables S2 and S3.xlsx

The copyright of individual parts of the supplement might differ from the article licence.
